# Supplementary material
Source: Springer Nature journal article supplement (https://www.springermedizin.de/resource/supplementary/12935_2011_329_MOESM6_ESM.pdf/9540410)

### AST

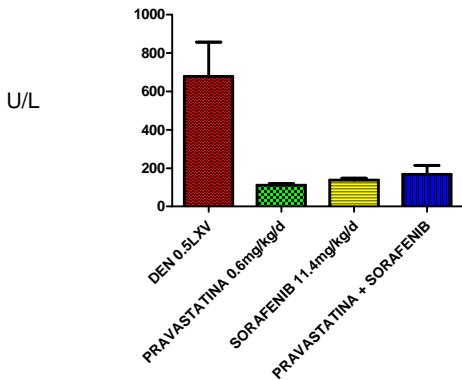

### ALT

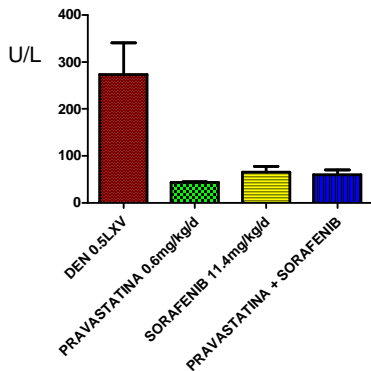

### GGT

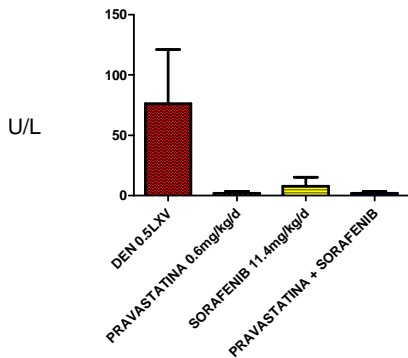

### AF

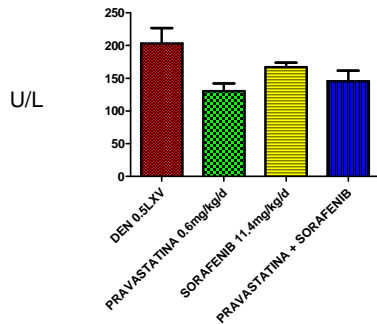

Supplement: MOESM6 [file 9540410]
